# Supplementary material for: Introductions of Human-Origin Seasonal H3N2, H1N2 and Pre-2009 H1N1 Influenza Viruses to Swine in Brazil
Source: MDPI journal article supplement (doi:10.3390/v15020576), 2023-02-19
Supplement: s1 [file s1]

**Table S1.** List of IAV strains of the subtypes H1N1, H1N2 and H3N2 isolated in pigs in Brazil during 2011-2020 and sequenced by Embrapa.

| Virus                              | GenBank accession number |          |
|------------------------------------|--------------------------|----------|
|                                    | HA                       | NA       |
| A/swine/Brazil/004-16-1/2015/H1N2  | MN973907                 | MN973909 |
| A/swine/Brazil/004-19/2019/H1N2    | MW772731                 | MW772733 |
| A/swine/Brazil/005-20/2019/H1N2    | MW772737                 | MW772739 |
| A/swine/Brazil/006-20/2019/H1N2    | MW772743                 | MW772745 |
| A/swine/Brazil/009-20/2020/H1N2    | MW772750                 | MW772752 |
| A/swine/Brazil/010-20/2020/H1N2    | MW772756                 | MW772758 |
| A/swine/Brazil/011-20/2020/H1N2    | MW772531                 | MW772533 |
| A/swine/Brazil/028-15-1/2015/H1N2  | MH559939                 | MH559941 |
| A/swine/Brazil/028-15-2/2015/H1N2  | MH559947                 | MH559949 |
| A/swine/Brazil/028-15-8/2015/H3N2  | MH559963                 | MH559965 |
| A/swine/Brazil/031-11-01/2011/H1N2 | KF680296                 | KF680298 |
| A/swine/Brazil/031-11-03/2011/H1N2 | KF680291                 | KF680292 |
| A/swine/Brazil/037-19/2019/H3N2    | MW772770                 | MW772772 |
| A/swine/Brazil/043-19/2019/H3N2    | MW772468                 | MW772470 |
| A/swine/Brazil/045-14-3/2014/H3N2  | MT041133                 | MT041135 |
| A/swine/Brazil/061-14-2/2014/H3N2  | MH559995                 | MH559997 |
| A/swine/Brazil/065-15-2/2015/H1N2  | MH560003                 | MH560005 |
| A/swine/Brazil/067-19-1/2018/H1N2  | MW772776                 | MW772778 |
| A/swine/Brazil/067-19-2/2018/H1N2  | MW772782                 | MW772784 |
| A/swine/Brazil/068-15/2015/H3N2    | MH559843                 | MH559845 |
| A/swine/Brazil/068-19-3/2018/H1N2  | MW772571                 | MW772573 |
| A/swine/Brazil/069-19-4/2018/H1N2  | MW772579                 | MW772581 |
| A/swine/Brazil/070-19-1/2018/H1N2  | MW772789                 | MW772791 |
| A/swine/Brazil/070-19-2/2018/H1N2  | MW772794                 | MW772796 |
| A/swine/Brazil/070-19-3/2018/H1N2  | MW772476                 | MW772478 |
| A/swine/Brazil/072-18-6/2018/H1N2  | MT068667                 | MT068669 |
| A/swine/Brazil/072-19-1/2019/H3N2  | MW772595                 | MW772597 |
| A/swine/Brazil/073-20/2020/H1N2    | MW772808                 | MW772810 |
| A/swine/Brazil/074-19-2/2019/H1N1  | MW772814                 | MW772816 |
| A/swine/Brazil/074-20/2020/H1N2    | MW772484                 | MW772486 |
| A/swine/Brazil/076-19-1/2019/H1N2  | MW772821                 | MW772823 |
| A/swine/Brazil/076-19-2/2019/H1N2  | MW772611                 | MW772613 |
| A/swine/Brazil/076-20-5/2020/H3N2  | MW772828                 | OP785777 |
| A/swine/Brazil/077-19-1/2019/H1N2  | MW772619                 | MW772621 |
| A/swine/Brazil/079-20-14/2020/H1N2 | MW772840                 | -        |
| A/swine/Brazil/079-20-16/2020/H3   | MW772847                 | -        |
| A/swine/Brazil/079-20-8/2020/H3N2  | MW772833                 | -        |
| A/swine/Brazil/081-19/2019/H1N2    | MW772851                 | MW772853 |
| A/swine/Brazil/082-19/2019/H1N2    | MW772627                 | MW772629 |

|                                     |            |            |
|-------------------------------------|------------|------------|
| A/swine/Brazil/085-19/2019/H1N2     | MW772492   | MW772494   |
| A/swine/Brazil/091-18-14/2017/H1N2  | MT068681   | MT068683   |
| A/swine/Brazil/091-18-2/2017/H3N2   | MT068674   | MT068676   |
| A/swine/Brazil/091-18-50/2017/H3    | MT068686   | -          |
| A/swine/Brazil/093-18-1/2018/H3N2   | MT041189   | MT041191   |
| A/swine/Brazil/094-18/2018/H3N2     | MT041197   | MT041199   |
| A/swine/Brazil/095-18/2018/H3N2     | MT068690   | MT068693   |
| A/swine/Brazil/103-14-2/2014/H1N1   | MG572188   | MG572190   |
| A/swine/Brazil/119-19/2019/H1N2     | MW772500   | MW772502   |
| A/swine/Brazil/121-19/2019/H1N2     | MW772872   | MW772874   |
| A/swine/Brazil/122-19/2019/H1N2     | MW772878   | MW772880   |
| A/swine/Brazil/123-19/2019/H1N2     | MW772508   | MW772510   |
| A/swine/Brazil/136-19/2019/H1N1     | MW772675   | MW772677   |
| A/swine/Brazil/137-19/2019/H3N2     | MW772890   | MW772892   |
| A/swine/Brazil/138-19/2019/H3N2     | MW772895   | MW772897   |
| A/swine/Brazil/139-19/2019/H3N2     | MW772900   | MW772902   |
| A/swine/Brazil/147-19/2019/H3N2     | MW772905   | MW772907   |
| A/swine/Brazil/148-19/2019/H3N2     | MW772683   | MW772685   |
| A/swine/Brazil/149-19/2019/H1N2     | MW772523   | MW772525   |
| A/swine/Brazil/154-14-1/2014/H3N2   | MH559859   | MH559861   |
| A/swine/Brazil/160-16/2016/H3N2     | MT068652   | MT068654   |
| A/swine/Brazil/161-16-2/2016/H3N2   | MT068659   | MT068661   |
| A/swine/Brazil/178-19/2019/H1N2     | MW772910   | MW772912   |
| A/swine/Brazil/180-19/2019/H1N2     | MW772691   | MW772693   |
| A/swine/Brazil/183-13-4/2013/H1N2   | MH560019   | MH560021   |
| A/swine/Brazil/185-11-7/2011/H1N2   | KM507519   | KM507521   |
| A/swine/Brazil/19-15-2/2015/H1N2    | MT041085   | MT041087   |
| A/swine/Brazil/213-14-8/2014/H1N2   | MH560027   | MH560029   |
| A/swine/Brazil/217-15/2015/H1N1     | MH559907   | MH559909   |
| A/swine/Brazil/223-15-1/2015/H1N2   | MH560035   | MH560037   |
| A/swine/Brazil/228-18-2/2018/H1N2   | MT068833   | MT068835   |
| A/swine/Brazil/231-11-1/2011/H3N2   | KM507535.2 | KM507537.2 |
| A/swine/Brazil/232-11-13/2011/H1N2  | KM507530   | KM507531   |
| A/swine/Brazil/232-11-14/2011/H1N2  | KM507532   | KM507534   |
| A/swine/Brazil/242-15-1/2015/H1N2   | MT068826   | MT068828   |
| A/swine/Brazil/246-18-200/2018/H3   | MT068698   | -          |
| A/swine/Brazil/246-18-206/2018/H3N2 | MT041101   | MT041103   |
| A/swine/Brazil/246-18-25/2018/H3    | MT068789   | -          |
| A/swine/Brazil/246-18-315/2018/H3   | MT068794   | -          |
| A/swine/Brazil/246-18-45/2018/H3N2  | MT041045   | MT041047   |
| A/swine/Brazil/255-19/2019/H1N2     | MW772923   | MW772925   |
| A/swine/Brazil/259-11-8/2011/H1N1   | MH559883   | MH559885   |
| A/swine/Brazil/274-18/2018/H1N2     | MT068703   | MT068705   |
| A/swine/Brazil/276-18/2018/H1N2     | MT068710   | MT068712   |

|                                         |          |          |
|-----------------------------------------|----------|----------|
| A/swine/Brazil/279-19/2019/H1N1         | MW772699 | MW772701 |
| A/swine/Brazil/281-18-1/2018/H1N2       | MT041069 | MT041071 |
| A/swine/Brazil/299-17-1/2017/H1N2       | MT068715 | MT068717 |
| A/swine/Brazil/299-17-2/2017/H1N2       | MT068812 | MT068814 |
| A/swine/Brazil/299-17-3/2017/H1N2       | MT068723 | MT068725 |
| A/swine/Brazil/334-19/2019/H1N2         | MW772929 | MW772931 |
| A/swine/Brazil/335-19/2019/H1N2         | MW772707 | MW772709 |
| A/swine/Brazil/350-19-10/2019/H1N2      | MW772715 | MW772717 |
| A/swine/Brazil/350-19-18/2019/H1N2      | MW772723 | MW772725 |
| A/swine/Brazil/350-19-70/2019/H3N2      | MW772937 | -        |
| A/swine/Brazil/355-11-6/2011/H3N2       | KM507503 | KM507505 |
| A/swine/Brazil/356-17/2017/H1N2         | MT068819 | MT068821 |
| A/swine/Brazil/360-17/2017/H3N2         | MN973915 | MN973917 |
| A/swine/Brazil/365-11-6/2011/H3N2       | KM507506 | -        |
| A/swine/Brazil/365-11-7/2011/H3N2       | KM507511 | KM507513 |
| A/swine/Brazil/515-17/2017/H1N2         | MT068729 | MT068731 |
| A/swine/Brazil/516-17/2017/H1N2         | MT068734 | MT068736 |
| A/swine/Brazil/520-17/2017/H3N2         | MT068739 | MT068741 |
| A/swine/Brazil/521-17/2017/H3N2         | MT068745 | MT068747 |
| A/swine/Brazil/523-17/2017/H1N2         | MT068758 | MT068760 |
| A/swine/Brazil/524-17/2017/H3N2         | MT068764 | MT068766 |
| A/swine/Brazil/526-17/2017/H1           | MT068771 | -        |
| A/swine/Brazil/527-17/2017/H3N2         | MN973899 | MN973901 |
| A/wild_boar/Brazil/214-11-13D/2011/H1N2 | KF572616 | KF572618 |

---

"-" NA segment not sequenced.

**Table S2.** Characteristics and phylogenetic clades of swIAV isolates in Brazilian pigs.

| Virus                              | State <sup>1</sup> | Collection |           | HA <sup>2</sup> | NA <sup>3</sup> | Reference |
|------------------------------------|--------------------|------------|-----------|-----------------|-----------------|-----------|
|                                    |                    | date       |           |                 |                 |           |
| A/swine/Brazil/010-20/2020/H1N2    | RS                 | 2020-01-06 | H1/1B.2.3 | N2/#4           |                 |           |
| A/swine/Brazil/011-20/2020/H1N2    | RS                 | 2020-01-13 | H1/1B.2.3 | N2/#1           |                 |           |
| A/swine/Brazil/067-19-1/2018/H1N2  | MS                 | 2018-10-04 | H1/1B.2.3 | N2/#5           |                 |           |
| A/swine/Brazil/067-19-2/2018/H1N2  | MS                 | 2018-10-04 | H1/1B.2.3 | N2/#5           |                 |           |
| A/swine/Brazil/074-19-2/2019/H1N1  | PR                 | 2019-03-18 | H1/1B.2.3 | N1pdm           |                 |           |
| A/swine/Brazil/085-19/2019/H1N2    | SC                 | 2019-07-05 | H1/1B.2.3 | N2/#4           |                 |           |
| A/swine/Brazil/103-14-2/2014/H1N1  | SC                 | Jun-14     | H1/1B.2.3 | N1 <sup>†</sup> |                 | [43]      |
| A/swine/Brazil/119-19/2019/H1N2    | SC                 | 2019-07-16 | H1/1B.2.3 | N2/#4           |                 |           |
| A/swine/Brazil/121-19/2019/H1N2    | SC                 | 2019-07-16 | H1/1B.2.3 | N2/#4           |                 |           |
| A/swine/Brazil/122-19/2019/H1N2    | SC                 | 2019-07-16 | H1/1B.2.3 | N2/#4           |                 |           |
| A/swine/Brazil/123-19/2019/H1N2    | SC                 | 2019-07-16 | H1/1B.2.3 | N2/#4           |                 |           |
| A/swine/Brazil/217-15/2015/H1N1    | PR                 | 2015-08-19 | H1/1B.2.3 | N1              |                 |           |
| A/swine/Brazil/255-19/2019/H1N2    | SC                 | 2019-10-02 | H1/1B.2.3 | N2/#4           |                 |           |
| A/swine/Brazil/259-11-8/2011/H1N1  | SC                 | Aug-11     | H1/1B.2.3 | N1              |                 | [43]      |
| A/swine/Brazil/274-18/2018/H1N2    | MS                 | 2018-04-16 | H1/1B.2.3 | N2/#5           |                 | [43]      |
| A/swine/Brazil/279-19/2019/H1N1    | RS                 | 2019-10-22 | H1/1B.2.3 | N1              |                 |           |
| A/swine/Brazil/281-18-1/2018/H1N2  | MG                 | 2018-07-25 | H1/1B.2.3 | N2/#4           |                 | [43]      |
| A/swine/Brazil/526-17/2017/H1      | RS                 | 2017-10-04 | H1/1B.2.3 | -               |                 |           |
| A/swine/Brazil/004-16-1/2015/H1N2  | SC                 | 2015-11-04 | H1/1B.2.4 | N2/#4           |                 | [43]      |
| A/swine/Brazil/009-20/2020/H1N2    | PR                 | 2020-01-07 | H1/1B.2.4 | N2/#4           |                 |           |
| A/swine/Brazil/31-11-01/2011/H1N2  | PR                 | 2011-03-01 | H1/1B.2.4 | N2/#4           |                 | [17]      |
| A/swine/Brazil/31-11-03/2011/H1N2  | PR                 | 2011-03-01 | H1/1B.2.4 | N2/#5           |                 | [17]      |
| A/swine/Brazil/068-19-3/2018/H1N2  | SC                 | 2018-10-23 | H1/1B.2.4 | N2/#4           |                 |           |
| A/swine/Brazil/069-19-4/2018/H1N2  | SC                 | 2018-10-29 | H1/1B.2.4 | N2/#4           |                 |           |
| A/swine/Brazil/072-18-6/2018/H1N2  | RS                 | 2018-03-21 | H1/1B.2.4 | N2/#5           |                 | [43]      |
| A/swine/Brazil/073-20/2020/H1N2    | PR                 | 2020-01-28 | H1/1B.2.4 | N2/#5           |                 |           |
| A/swine/Brazil/074-20/2020/H1N2    | PR                 | 2020-02-11 | H1/1B.2.4 | N2/#2           |                 |           |
| A/swine/Brazil/077-19-1/2019/H1N2  | SP                 | 2019-05-28 | H1/1B.2.4 | N2/#4           |                 |           |
| A/swine/Brazil/079-20-14/2020/H1N2 | SC                 | 2020-05-05 | H1/1B.2.4 | N2              |                 |           |
| A/swine/Brazil/082-19/2019/H1N2    | MG                 | 2019-06-25 | H1/1B.2.4 | N2/#4           |                 |           |
| A/swine/Brazil/091-18-14/2017/H1N2 | MG                 | 2017-09-25 | H1/1B.2.4 | N2/#4           |                 | [43]      |
| A/swine/Brazil/180-19/2019/H1N2    | SC                 | 2019-08-20 | H1/1B.2.4 | N2/#4           |                 |           |
| A/swine/Brazil/183-13-4/2013/H1N2  | SC                 | Dec-13     | H1/1B.2.4 | N2/#4           |                 | [43]      |
| A/swine/Brazil/185-11-7/2011/H1N2  | SC                 | 2011-07-06 | H1/1B.2.4 | N2/#4           |                 | [17]      |
| A/swine/Brazil/19-15-2/2015/H1N2   | SC                 | 2015-02-11 | H1/1B.2.4 | N2/#4           |                 | [43]      |
| A/swine/Brazil/213-14-8/2014/H1N2  | SC                 | 2014-11-03 | H1/1B.2.4 | N2/#4           |                 | [43]      |

|                                         |    |            |             |       |         |
|-----------------------------------------|----|------------|-------------|-------|---------|
| A/swine/Brazil/223-15-1/2015/H1N2       | SC | 2015-10-20 | H1/1B.2.4   | N2/#4 | [43]    |
| A/swine/Brazil/228-18-2/2018/H1N2       | MG | 2018-01-19 | H1/1B.2.4   | N2/#4 | [43]    |
| A/swine/Brazil/232-11-13/2011/H1N2      | SC | 2011-08-17 | H1/1B.2.4   | N2/#4 | [17]    |
| A/swine/Brazil/242-15-1/2015/H1N2       | SC | 2015-11-05 | H1/1B.2.4   | N2/#4 | [43]    |
| A/swine/Brazil/276-18/2018/H1N2         | PR | 2018-04-23 | H1/1B.2.4   | N2/#5 | [43]    |
| A/swine/Brazil/299-17-3/2017/H1N2       | SC | 2017-08-10 | H1/1B.2.4   | N2/#4 | [43]    |
| A/swine/Brazil/350-19-10/2019/H1N2      | SC | 2019-06-04 | H1/1B.2.4   | N2/#4 |         |
| A/swine/Brazil/350-19-18/2019/H1N2      | SC | 2019-06-04 | H1/1B.2.4   | N2/#4 |         |
| A/swine/Brazil/515-17/2017/H1N2         | MG | 2017-06-05 | H1/1B.2.4   | N2/#4 | [43]    |
| A/swine/Brazil/516-17/2017/H1N2         | MG | 2017-06-06 | H1/1B.2.4   | N2/#4 | [43]    |
| A/swine/Brazil/523-17/2017/H1N2         | SC | 2017-09-11 | H1/1B.2.4   | N2/#4 | [43]    |
| A/swine/Brazil/G2P1/2013/H1N2           | RS | 2013-06-05 | H1/1B.2.4   | N2/#4 | [42]    |
| A/swine/Brazil/G2P2/2013/H1N2           | RS | 2013-06-05 | H1/1B.2.4   | N2/#4 | [42]    |
| A/wild_boar/Brazil/214-11-13D/2011/H1N2 | RS | Aug-11     | H1/1B.2.4   | N2/#5 | [17,41] |
| A/swine/Brazil/081-19/2019/H1N2         | MG | 2019-04-02 | H1/1B.2.6   | N2/#6 |         |
| A/swine/Brazil/136-19/2019/H1N1         | MG | 2019-08-07 | H1/1B.2.6   | N1†   |         |
| A/swine/Brazil/149-19/2019/H1N2         | MG | 2019-09-03 | H1/1B.2.6   | N2/#6 |         |
| A/swine/Brazil/178-19/2019/H1N2         | MG | 2019-09-03 | H1/1B.2.6   | N2/#6 |         |
| A/swine/Brazil/334-19/2019/H1N2         | MG | 2019-11-11 | H1/1B.2.6   | N2/#6 |         |
| A/swine/Brazil/335-19/2019/H1N2         | MG | 2019-11-11 | H1/1B.2.6   | N2/#6 |         |
| A/swine/Brazil/004-19/2019/H1N2         | SC | 2019-01-22 | H1†         | N2/#4 |         |
| A/swine/Brazil/005-20/2019/H1N2         | SC | 2019-11-13 | H1†         | N2/#4 |         |
| A/swine/Brazil/006-20/2019/H1N2         | SC | 2019-11-13 | H1†         | N2/#4 |         |
| A/swine/Brazil/028-15-1/2015/H1N2       | SC | 2015-02-26 | H1†         | N2/#4 |         |
| A/swine/Brazil/028-15-2/2015/H1N2       | SC | 2015-02-26 | H1†         | N2/#4 |         |
| A/swine/Brazil/065-15-2/2015/H1N2       | PR | 2015-04-07 | H1†         | N2/#4 |         |
| A/swine/Brazil/070-19-1/2018/H1N2       | SC | 2018-11-21 | H1†         | N2/#4 |         |
| A/swine/Brazil/070-19-2/2018/H1N2       | SC | 2018-11-21 | H1†         | N2/#4 |         |
| A/swine/Brazil/070-19-3/2018/H1N2       | SC | 2018-11-21 | H1†         | N2/#4 |         |
| A/swine/Brazil/076-19-1/2019/H1N2       | PR | 2019-06-04 | H1†         | N2/#2 |         |
| A/swine/Brazil/076-19-2/2019/H1N2       | PR | 2019-06-04 | H1†         | N2/#2 |         |
| A/swine/Brazil/232-11-14/2011/H1N2      | SC | 2011-08-17 | H1†         | N2/#4 | [17]    |
| A/swine/Brazil/299-17-1/2017/H1N2       | SC | 2017-08-10 | H1†         | N2/#4 |         |
| A/swine/Brazil/299-17-2/2017/H1N2       | SC | 2017-08-10 | H1†         | N2/#4 |         |
| A/swine/Brazil/356-17/2017/H1N2         | SC | 2017-08-14 | H1†         | N2/#4 |         |
| A/swine/Brazil/043-19/2019/H3N2         | SC | 2019-04-24 | H3/1990.5.1 | N2/#4 |         |
| A/swine/Brazil/045-14-3/2014/H3N2       | SC | Mar-14     | H3/1990.5.1 | N2/#4 | [43]    |
| A/swine/Brazil/076-20-5/2020/H3N2       | SC | 2020-04-14 | H3/1990.5.1 | N2#4  |         |
| A/swine/Brazil/091-18-2/2017/H3N2       | MG | 2017-09-25 | H3/1990.5.1 | N2/#4 |         |

|                                     |    |                        |       |      |
|-------------------------------------|----|------------------------|-------|------|
| A/swine/Brazil/091-18-50/2017/H3    | MG | 2017-09-25 H3/1990.5.1 | -     | [43] |
| A/swine/Brazil/148-19/2019/H3N2     | PR | 2019-08-27 H3/1990.5.1 | N2/#2 |      |
| A/swine/Brazil/154-14-1/2014/H3N2   | RS | Aug-14 H3/1990.5.1     | N2/#4 |      |
| A/swine/Brazil/161-16-2/2016/H3N2   | MT | 2016-09-09 H3/1990.5.1 | N2/#4 | [43] |
| A/swine/Brazil/231-11-1/2011/H3N2   | SC | 2011-08-17 H3/1990.5.1 | N2/#4 | [17] |
| A/swine/Brazil/355-11-6/2011/H3N2   | RS | 2011-10-27 H3/1990.5.1 | N2/#4 | [17] |
| A/swine/Brazil/365-11-6/2011/H3N2   | MS | Nov-11 H3/1990.5.1     | -     | [17] |
| A/swine/Brazil/365-11-7/2011/H3N2   | MS | 2011-11-10 H3/1990.5.1 | N2/#4 | [17] |
| A/swine/Brazil/521-17/2017/H3N2     | RS | 2017-09-28 H3/1990.5.1 | N2/#3 | [43] |
| A/swine/Brazil/524-17/2017/H3N2     | RS | 2017-10-16 H3/1990.5.1 | N2/#4 | [43] |
| A/swine/Brazil/527-17/2017/H3N2     | RS | 2017-09-28 H3/1990.5.1 | N2/#4 | [43] |
| A/swine/Brazil/028-15-8/2015/H3N2   | SC | 2015-02-26 H3/1990.5.2 | N2/#4 | [43] |
| A/swine/Brazil/061-14-2/2014/H3N2   | SC | Apr-14 H3/1990.5.2     | N2/#4 |      |
| A/swine/Brazil/068-15/2015/H3N2     | SC | 2015-04-14 H3/1990.5.2 | N2/#4 |      |
| A/swine/Brazil/072-19-1/2019/H3N2   | SC | 2019-01-17 H3/1990.5.2 | N2/#4 |      |
| A/swine/Brazil/079-20-16/2020/H3    | SC | 2020-05-05 H3/1990.5.2 | -     |      |
| A/swine/Brazil/079-20-8/2020/H3N2   | SC | 2020-05-05 H3/1990.5.2 | -     |      |
| A/swine/Brazil/093-18-1/2018/H3N2   | SC | 2018-01-09 H3/1990.5.2 | N2/#4 | [43] |
| A/swine/Brazil/094-18/2018/H3N2     | SC | 2018-01-30 H3/1990.5.2 | N2/#4 | [43] |
| A/swine/Brazil/095-18/2018/H3N2     | PR | 2018-02-07 H3/1990.5.2 | N2/#4 | [43] |
| A/swine/Brazil/137-19/2019/H3N2     | PR | 2019-07-22 H3/1990.5.2 | N2/#4 |      |
| A/swine/Brazil/138-19/2019/H3N2     | MG | 2019-07-16 H3/1990.5.2 | N2/#4 |      |
| A/swine/Brazil/139-19/2019/H3N2     | RS | 2019-07-10 H3/1990.5.2 | N2/#4 |      |
| A/swine/Brazil/147-19/2019/H3N2     | MG | 2019-08-13 H3/1990.5.2 | N2/#4 |      |
| A/swine/Brazil/246-18-200/2018/H3   | SC | 2018-07-10 H3/1990.5.2 | -     |      |
| A/swine/Brazil/246-18-206/2018/H3N2 | SC | 2018-07-24 H3/1990.5.2 | N2/#4 | [43] |
| A/swine/Brazil/246-18-25/2018/H3    | SC | 2018-06-28 H3/1990.5.2 | -     | [43] |
| A/swine/Brazil/246-18-315/2018/H3   | SC | 2018-08-16 H3/1990.5.2 | -     | [43] |
| A/swine/Brazil/246-18-45/2018/H3N2  | SC | 2018-07-03 H3/1990.5.2 | N2/#4 | [43] |
| A/swine/Brazil/350-19-70/2019/H3N2  | SC | 2019-05-06 H3/1990.5.2 | -     |      |
| A/swine/Brazil/360-17/2017/H3N2     | SC | 2017-08-30 H3/1990.5.2 | N2/#4 | [43] |
| A/swine/Brazil/520-17/2017/H3N2     | SC | 2017-08-30 H3/1990.5.2 | N2/#4 | [43] |
| A/swine/Brazil/037-19/2019/H3N2     | SP | 2019-03-18 H3/1990.5.3 | N2/#4 |      |
| A/swine/Brazil/160-16/2016/H3N2     | PR | 2016-09-09 H3/1990.5.3 | N2/#4 | [43] |

HA, hemagglutinin; NA neuraminidase; MG, Minas Gerais; MS, Mato Grosso do Sul; MT, Mato Grosso; PR, Paraná; RS, Rio Grande do Sul; SC, Santa Catarina; SP, São Paulo; NI, not informed; -, sequence not available.

<sup>1</sup>Location of virus collection among the seven States in Southern, Midwestern and Southeastern Brazil provided for each sample (Figure 1).

<sup>2</sup>Genetic clade of HA sequence.

<sup>3</sup>Genetic clade of NA sequence.

<sup>†</sup>HA of 1A.3.3.2 lineage (or pandemic H1).

<sup>‡</sup>NA of pandemic N1.

**Table S3.** Average percent pairwise nucleotide distances (*p*-distance) within and between H1 1B phylogenetic clades.

| APD (%)  |              |               |        |        |          |          |          |        |        |          |          |        |        |        |
|----------|--------------|---------------|--------|--------|----------|----------|----------|--------|--------|----------|----------|--------|--------|--------|
| Clade    | Within clade | Between clade |        |        |          |          |          |        |        |          |          |        |        |        |
|          |              | 1B.1          | 1B.1.1 | 1B.1.2 | 1B.1.2.1 | 1B.1.2.2 | 1B.1.2.3 | 1B.2.1 | 1B.2.2 | 1B.2.2.1 | 1B.2.2.2 | 1B.2.3 | 1B.2.4 | 1B.2.6 |
| 1B.1     | 4.7          |               |        |        |          |          |          |        |        |          |          |        |        |        |
| 1B.1.1   | 7.3          | 9.2           |        |        |          |          |          |        |        |          |          |        |        |        |
| 1B.1.2   | 7.3          | 8.9           | 11.4   |        |          |          |          |        |        |          |          |        |        |        |
| 1B.1.2.1 | 5.7          | 8.9           | 11.1   | 8.8    |          |          |          |        |        |          |          |        |        |        |
| 1B.1.2.2 | 5.9          | 10.4          | 12.3   | 9.9    | 9.5      |          |          |        |        |          |          |        |        |        |
| 1B.1.2.3 | 5.3          | 9.5           | 11.3   | 8.8    | 8.7      | 9.2      |          |        |        |          |          |        |        |        |
| 1B.2.1   | 5.6          | 13.2          | 14.8   | 15.2   | 15.0     | 16.4     | 14.9     |        |        |          |          |        |        |        |
| 1B.2.2   | 3.8          | 11.3          | 13.0   | 13.2   | 13.1     | 14.4     | 12.9     | 8.6    |        |          |          |        |        |        |
| 1B.2.2.1 | 4.4          | 13.6          | 15.0   | 15.6   | 15.3     | 16.3     | 15.2     | 11.2   | 6.7    |          |          |        |        |        |
| 1B.2.2.2 | 4.7          | 12.9          | 14.3   | 14.8   | 14.6     | 15.5     | 14.4     | 10.7   | 6.1    | 6.7      |          |        |        |        |
| 1B.2.3   | 5.0          | 12.1          | 13.9   | 14.3   | 14.2     | 15.5     | 14.1     | 8.7    | 7.5    | 10.3     | 9.8      |        |        |        |
| 1B.2.4   | 6.4          | 12.7          | 14.5   | 14.5   | 14.3     | 15.7     | 14.4     | 10.0   | 7.2    | 9.8      | 9.2      | 9.2    |        |        |
| 1B.2.6   | 3.4          | 14.4          | 15.5   | 15.8   | 15.8     | 17.2     | 15.7     | 15.1   | 13.5   | 15.3     | 14.8     | 14.8   | 14.6   |        |

**Table S4.** Average percent pairwise nucleotide distances (*p*-distance) within and between H3 1990.5 phylogenetic clades.

| APD (%)  |                |          |          |          |          |
|----------|----------------|----------|----------|----------|----------|
| H3 Clade | Between clades |          |          |          |          |
|          | Within clade   | 1990.5.1 | 1990.5.2 | 1990.5.3 | 1990.5.4 |
| 1990.5.1 | 4.5            |          |          |          |          |
| 1990.5.2 | 2.9            | 7.8      |          |          |          |
| 1990.5.3 | 1.7            | 9.4      | 10.4     |          |          |
| 1990.5.4 | 0.5            | 11.5     | 12.0     | 11.2     |          |



**Table S5.** Characteristics of the eight introductions of human seasonal Influenza A viruses into swine in Brazil.

| Human-to-swine spillover event | Virus subtype | Related human seasonal IAV         | Segment | Estimated interval of human-to-swine transmission (90% MPD) | Year of isolation of the most recent swIAV | Swine genetic clade | Detected IAV subtypes |
|--------------------------------|---------------|------------------------------------|---------|-------------------------------------------------------------|--------------------------------------------|---------------------|-----------------------|
| 1                              | H1N1          | A/Singapore/6/1986 (H1N1)          | H1      | 1985.1 - 2009.1                                             | 2019                                       | 1B.2.6              | H1N1, H1N2            |
| 2                              | H1N1          | A/England/494/2006 (H1N1)          | H1      | 2003.8 - 2008.9                                             | 2020                                       | 1B.2.3              | H1N1, H1N2            |
|                                |               | A/Valparaiso/514/2007 (H1N1)       | N1      | 2004.8 - 2009.3                                             | 2019                                       | N1                  | H1N1                  |
| 3                              | H1N2          | A/Memphis/8/2003 (H1N2)            | H1      | 2001.2 - 2002.6                                             | 2020                                       | 1B.2.4              | H1N1, H1N2            |
|                                |               | A/North Carolina/7/2002 (H1N2)     | N2      | 2001.6 - 2017 <sup>1</sup>                                  | 2017                                       | N2-#3               | H3N2                  |
| 4                              | H3N2          | A/NewYork/596/1996 (H3N2)          | H3      | 1994.9 - 2001.9                                             | 2020                                       | H3.1990.5           | H3N2                  |
|                                |               | A/Brazil/97/1997 (H3N2)            | N2      | 1995.9 - 2001                                               | 2020                                       | N2-#4               | H1N2, H3N2            |
| 5                              | H3N2          | A/Argentina/89/1998 (H3N2)         | N2      | 1997.6 - 2005.4                                             | 2020                                       | N2-#5               | H1N2                  |
| 6                              | H3N2          | A/Alabama/01/1998 (H3N2)           | N2      | 1997.1 - 2016.1                                             | 2019                                       | N2-#6               | H1N2                  |
| 7                              | H3N2          | A/Idaho/03/2011 (H3N2)             | N2      | 2010.6 - 2016.8                                             | 2020                                       | N2-#2               | H1N2, H3N2            |
| 8                              | H3N2          | A/Pelotas/LACENRS_1787/2015 (H3N2) | N2      | 2014.4 - 2020 <sup>1</sup>                                  | 2020                                       | N2-#1               | H1N2                  |

<sup>1</sup> MDP, marginal probability distribution.<sup>2</sup> Upper value based on the year of isolation of the single representative virus strain for this clade.
