# Supplementary material for: Introductions of Human-Origin Seasonal H3N2, H1N2 and Pre-2009 H1N1 Influenza Viruses to Swine in Brazil
Source: MDPI journal article supplement (doi:10.3390/v15020576), 2023-02-19
Supplement: s1 [file s1]

Human seasonal PB2

H1N1pdm09

TRIG

Classical

Brazil

Figure S1. Maximum likelihood tree of polymerase basic (PB) 2 gene segment of the 84 full-genome Brazilian swIAVs and the reference database provided by octoFlu (<https://github.com/flu-crew/octoflu>). Phylogenetic tree was generated using the octoFlu pipeline which includes a reference dataset containing sequences of pandemic (magenta), TRIG (blue), classical (orange) and human seasonal origin (brown).

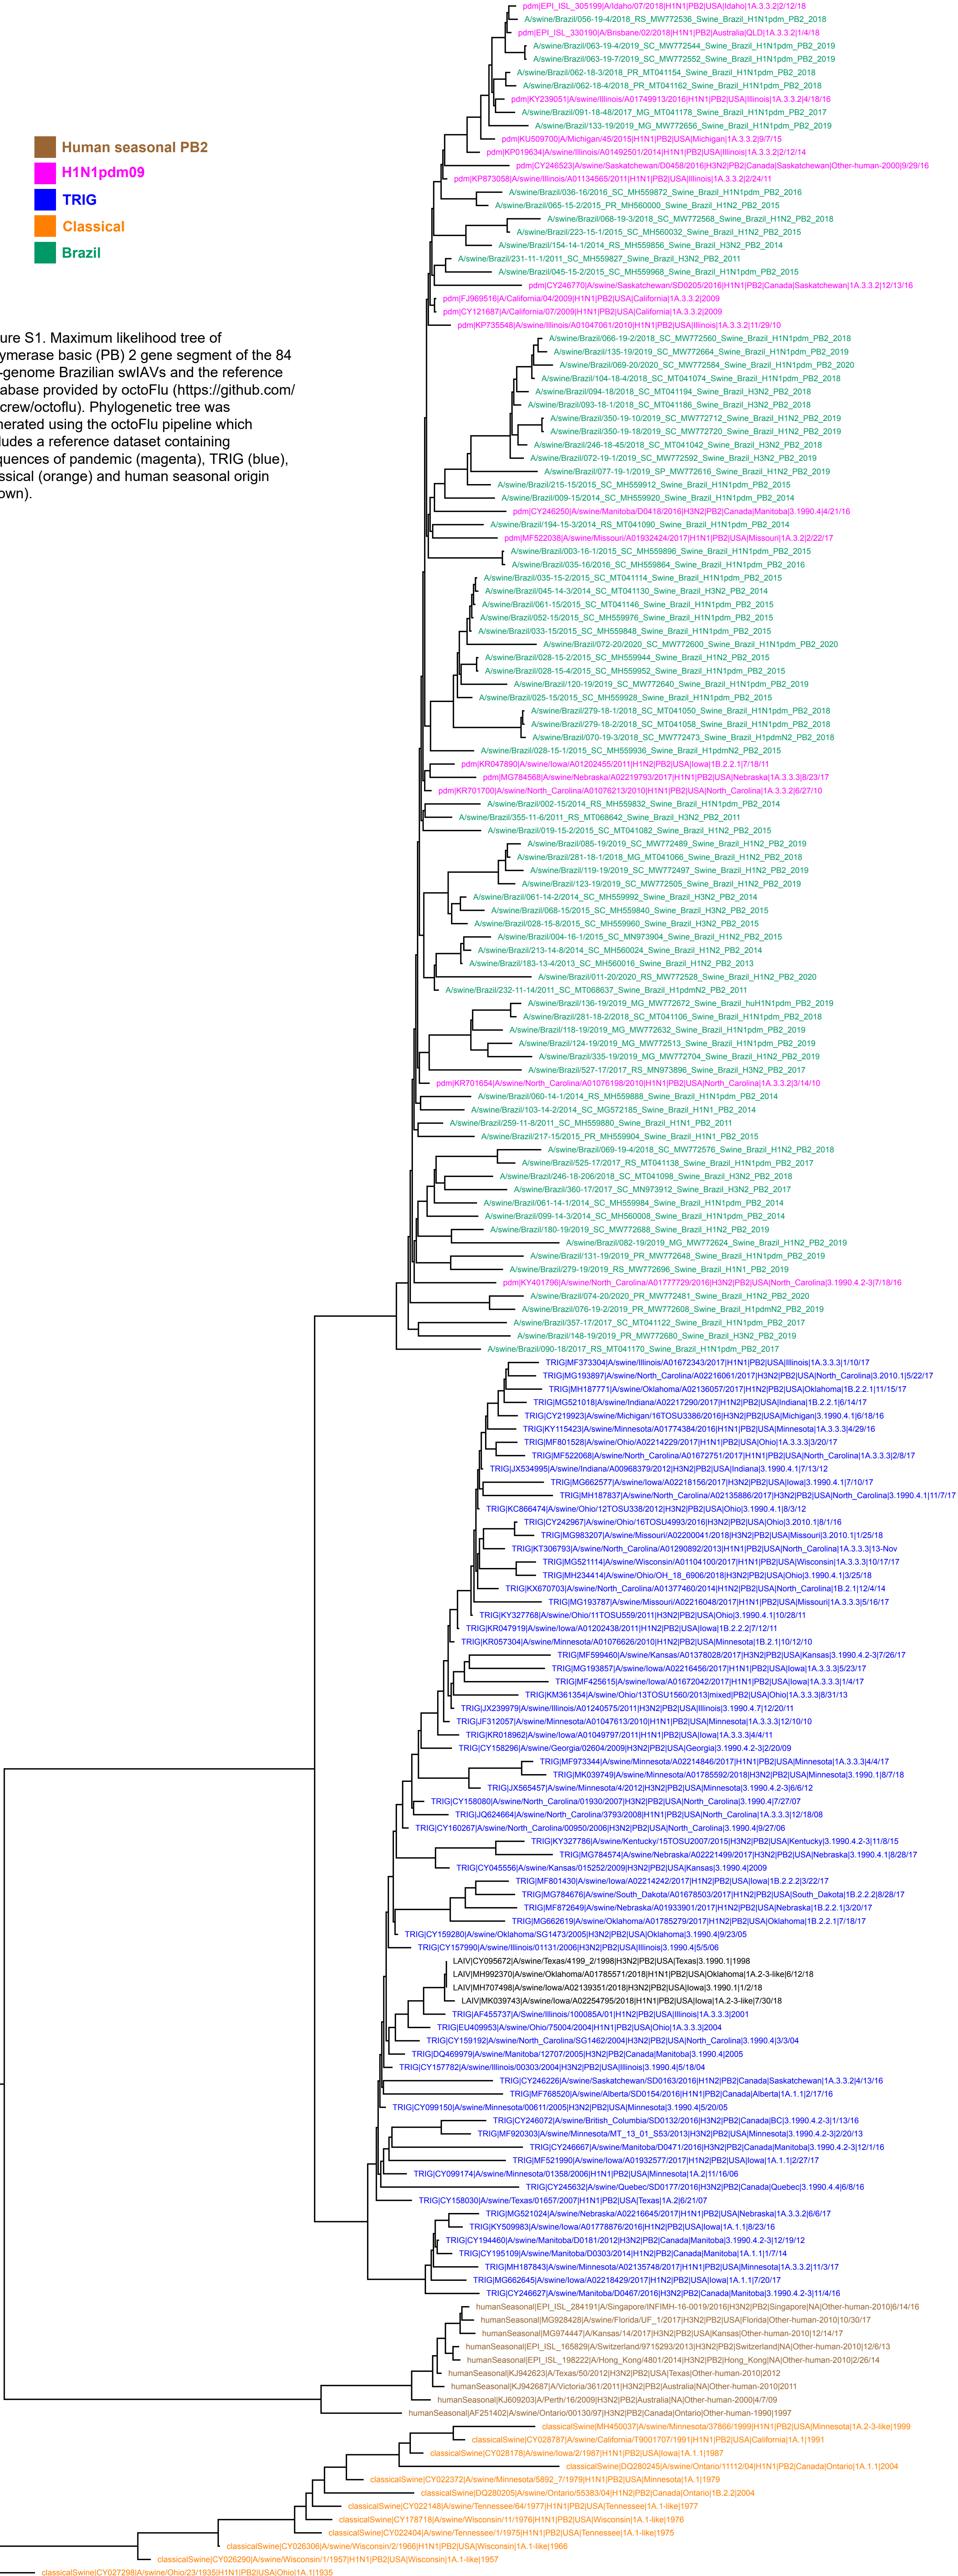



Human seasonal PB1  
H1N1pdm09  
TRIG  
Classical  
Brazil

Figure S2. Maximum likelihood tree of polymerase basic (PB) 1 gene segment of the 84 full-genome Brazilian swIAVs and the reference database provided by octoFlu. Phylogenetic tree was generated using the octoFlu pipeline which includes a reference dataset containing sequences of pandemic (magenta), TRIG (blue), classical (orange) and human seasonal origin (brown).

0.03



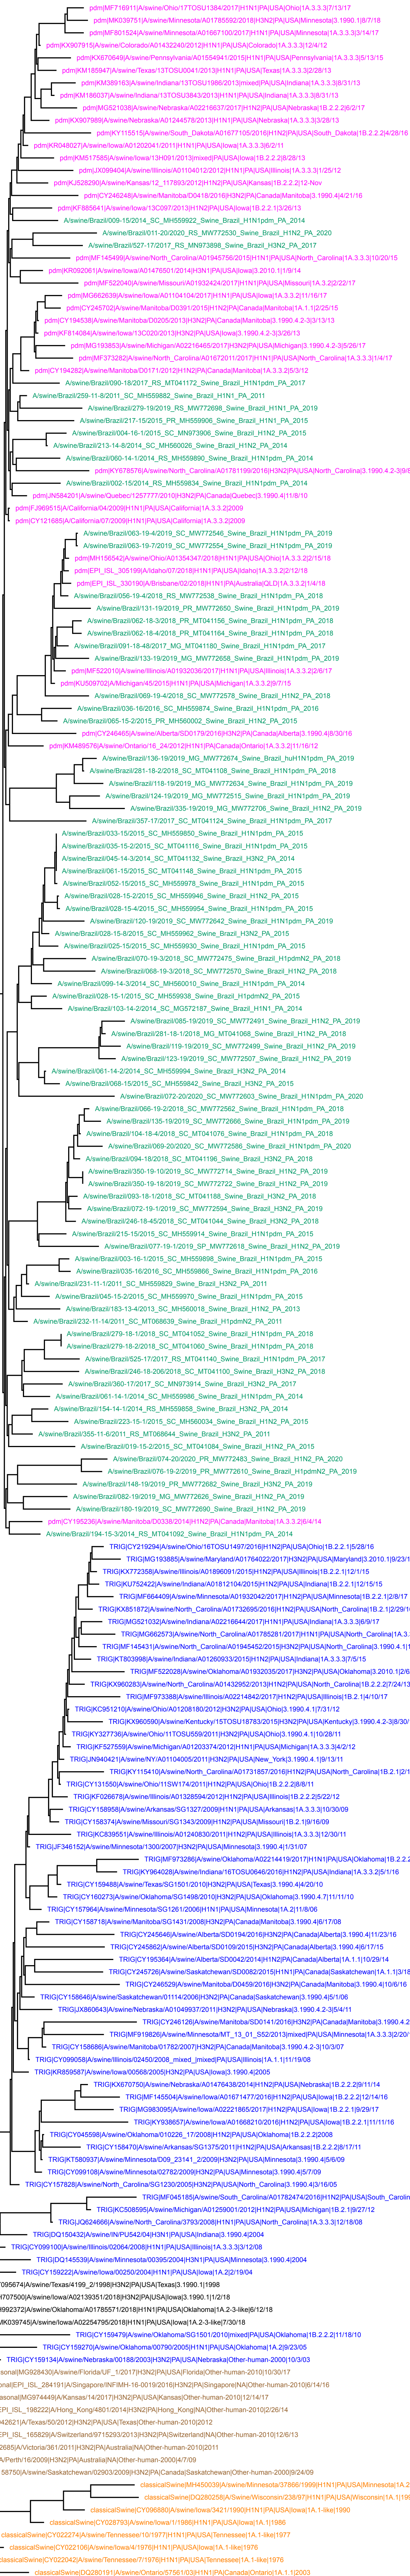

Figure S3. Maximum likelihood tree of polymerase acid (PA) gene segment of the 84 full-genome Brazilian swAVIs and the reference database provided by octoFlu. Phylogenetic tree was generated using the octoFlu pipeline which includes a reference dataset containing sequences of pandemic (magenta), TRIG (blue), classical (orange) and human seasonal origin (brown).



Human seasonal NP  
H1N1pdm09  
TRIG  
Classical  
Brazil

Figure S4. Maximum likelihood tree of nucleoprotein (NP) gene segment of the 84 full-genome Brazilian swIAVs and the reference database provided by octoFlu. Phylogenetic tree was generated using the octoFlu pipeline which includes a reference dataset containing sequences of pandemic (magenta), TRIG (blue), classical (orange) and human seasonal origin (brown).

0.02



Human seasonal M  
H1N1pdm09  
TRIG  
Brazil

Figure S5. Maximum likelihood tree of matrix (M) gene segment of the 84 full-genome Brazilian swIAVs and the reference database provided by octoFlu. Phylogenetic tree was generated using the octoFlu pipeline which includes a reference dataset containing sequences of pandemic (magenta), TRIG (blue) and human seasonal origin (brown).

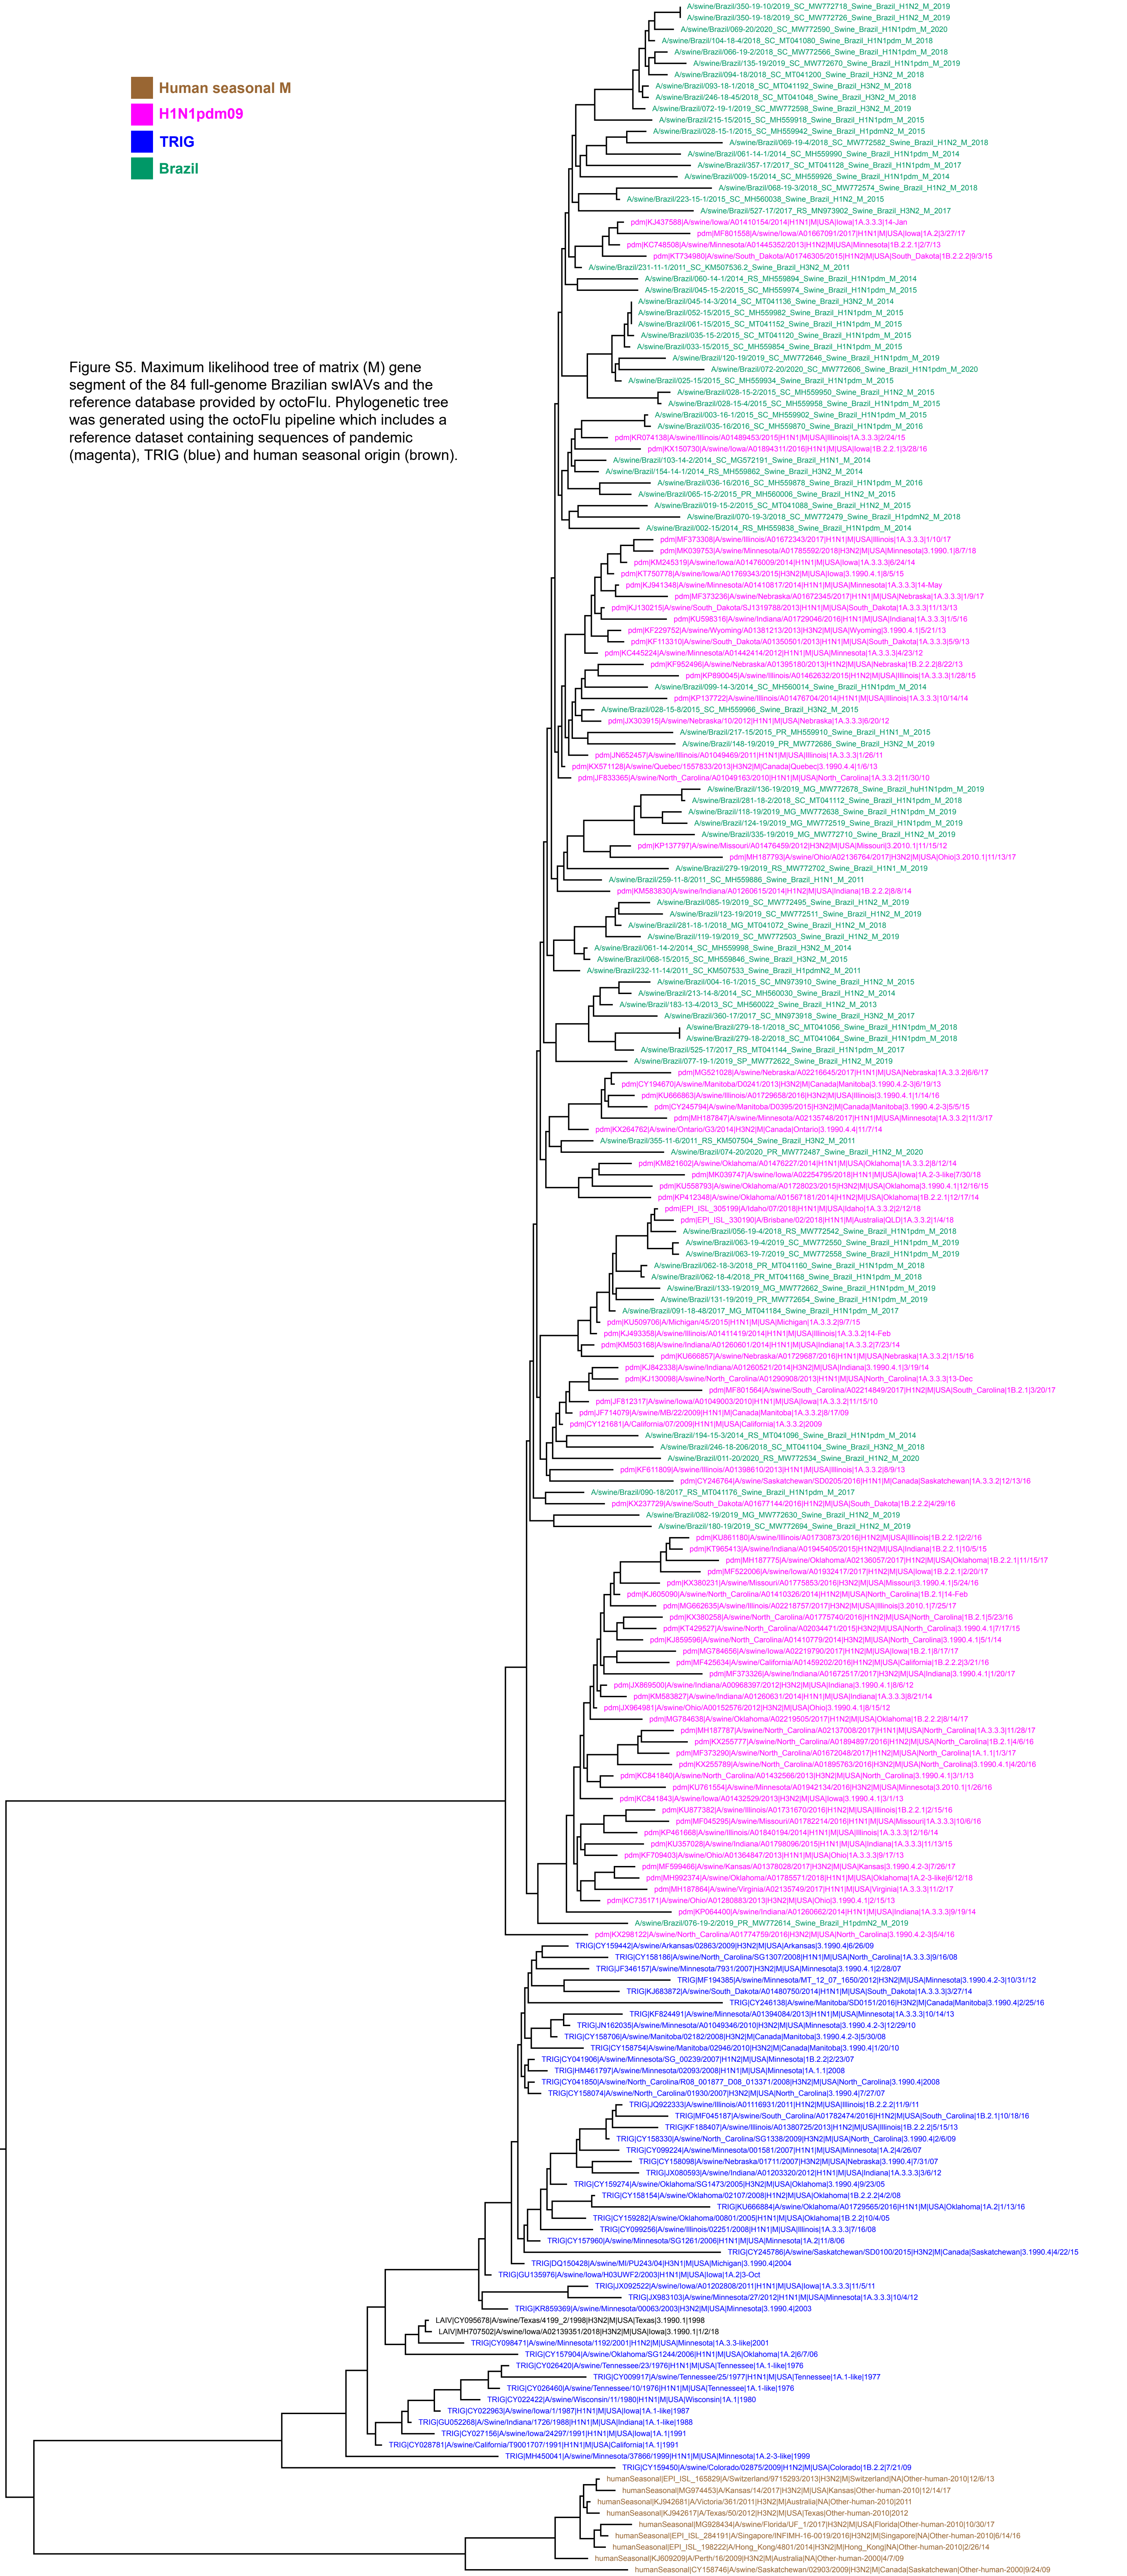



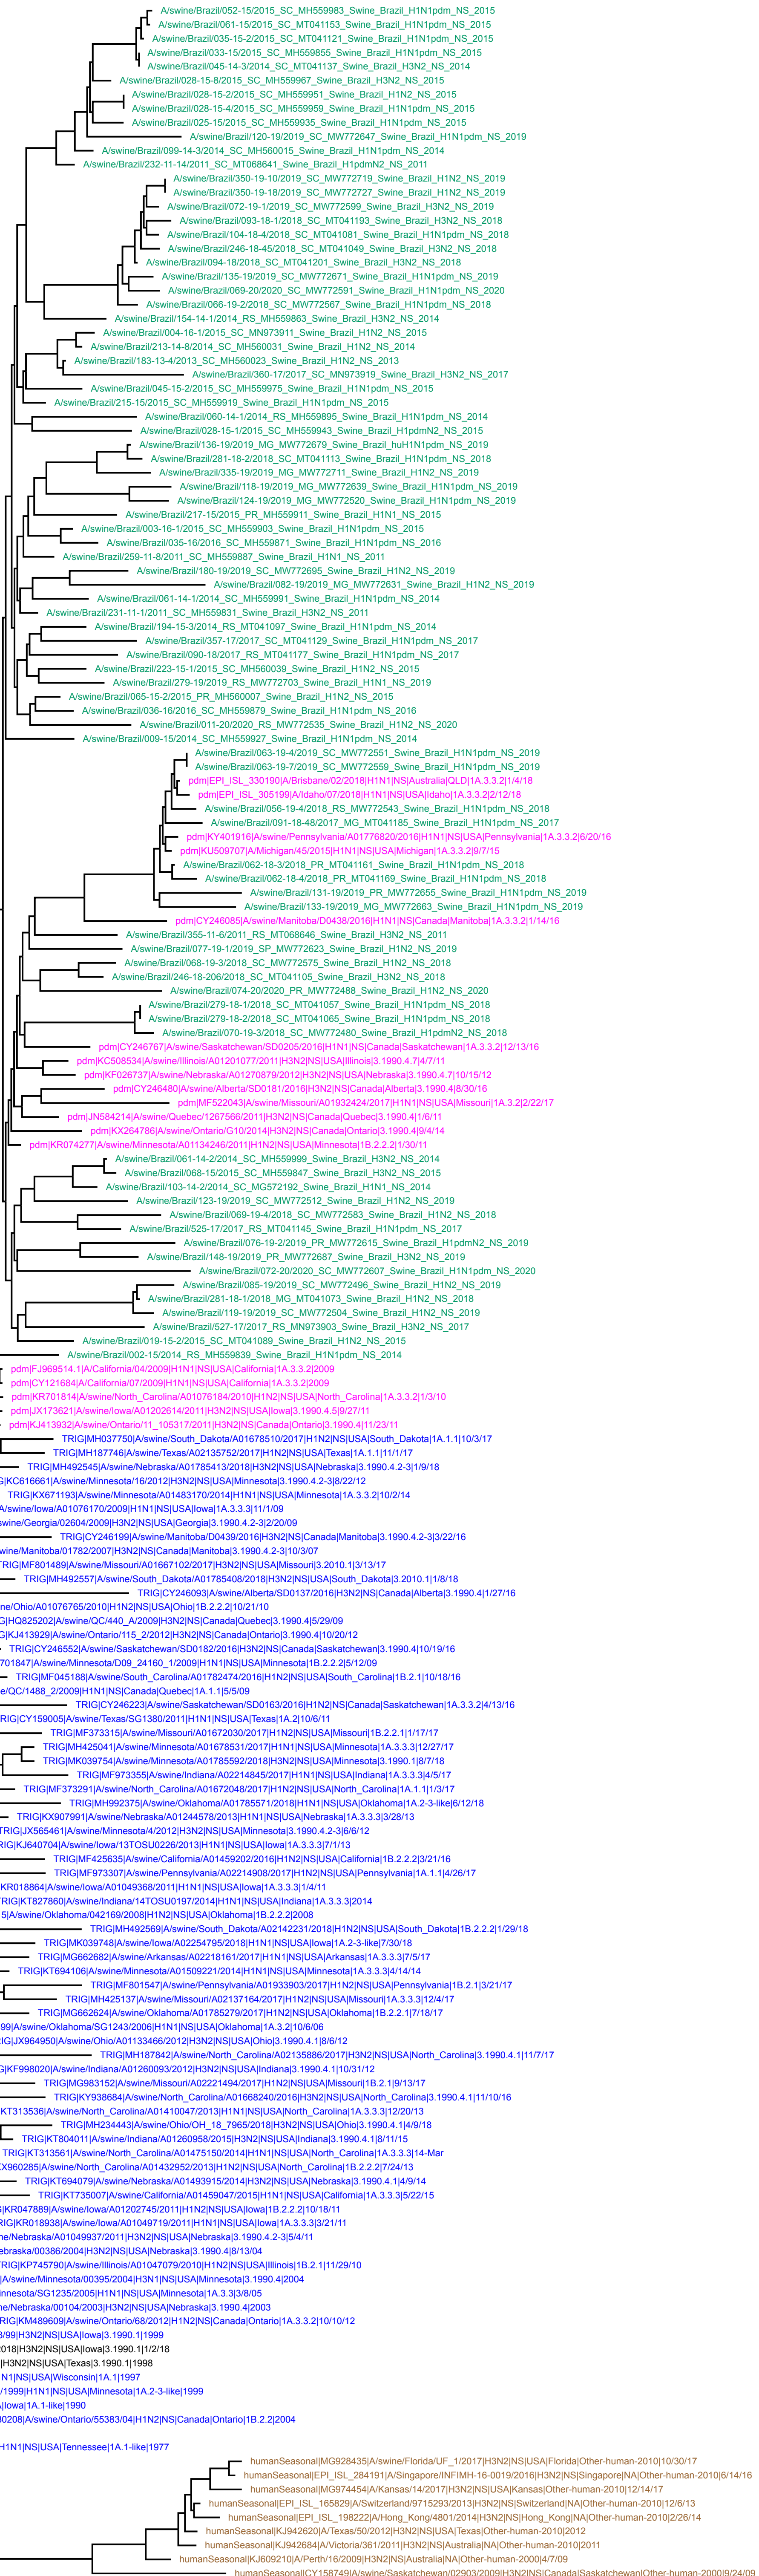

TRIG|MH430042|A/swine/lowe

TRIG|CY096879|A/swine/lowe

TRIG|CY022425|A/swine/Wisconsin/11/1980|H1N1|NS|U

TRIG|CY026479|A/swine/Wisconsin/11/1980|H1N1|NS|U

humanSeasonal[MG928435/a/Swine/Florida/UF\_12017][H3N2/US/Florida/Other-human-2010/10/30/17]  
humanSeasonal[EPI\_1284191/a/Singapore/INF1HM-11-05/1920/16][H3N2/Singapore/NA/Other-human-2010/06/14/16]  
humanSeasonal[MG974454/a/Kansas/14/2017][H3N2/US/Kansas/Other-human-2010/12/14/17]  
humanSeasonal[EPI\_156529/a/Switzerland/9715293/2017][H3N2/Switzerland/NA/Other-human-2010/12/26/13]  
humanSeasonal[EPI\_165292/a/Hong\_Kong/12012/14][H3N2/Hong\_Kong/NA/Other-human-2010/02/26/14]  
humanSeasonal[KJ46260/a/Texas/605/2012][H3N2/US/Texas/Other-human-2010/02/12/12]  
humanSeasonal[KJ42684/a/Victoria/361/2011][H3N2/Australia/NA/Other-human-2010/02/11/11]  
human[KJ609210/a/Perth/16/2011][H3N2/Australia/NA/Other-human-2004/07/409]  
humanSeasonal[CQ1587438/a/Wine/Saskatchewan/02903/2009][H3N2/Canada/Saskatchewan/Other-human-2009/24/09]
